# Supplementary material
Source: HighWire-hosted journal article supplement (https://erj.ersjournals.com/highwire/filestream/113791/field_highwire_adjunct_files/0/som_erj_r1.pdf)
Supplement: som_erj_r1.pdf [file som_erj_r1.pdf]

# **Assessing spatial heterogeneity of MDR-TB in a high burden country –**

## **Appendix**

Helen E. Jenkins<sup>1,2\*</sup>, Valeriu Plesca<sup>3</sup>, Anisoara Ciobanu<sup>3</sup>, Valeriu Crudu<sup>4</sup>, Irina Galusca<sup>3</sup>, Viorel Soltan<sup>4</sup>, Aliona Serbulenco<sup>5</sup>, Matteo Zignol<sup>6</sup>, Andrei Dadu<sup>7</sup>, Masoud Dara<sup>7</sup>, Ted Cohen<sup>1,8</sup>

<sup>1</sup>Brigham and Women's Hospital, Boston, USA, <sup>2</sup>Harvard Medical School, Boston, USA,  
<sup>3</sup>National Centre of Health Management, Chisinau, Republic of Moldova, <sup>4</sup>Center for Health Policies and Studies, Chisinau, Republic of Moldova, <sup>5</sup>Ministry of Health, Chisinau, Republic of Moldova, <sup>6</sup>Stop TB Department, World Health Organization, Geneva, Switzerland, <sup>7</sup>World Health Organization, Regional Office for Europe, Copenhagen, Denmark, <sup>8</sup>Harvard School of Public Health, Boston, USA.

\* Author for correspondence: Dr Helen E. Jenkins, Harvard Medical School, 641 Huntington Avenue, Boston, MA 02115, USA. Email: [jenkins.helen@gmail.com](mailto:jenkins.helen@gmail.com), telephone: +1 617 432

1731

## Appendix methods

### *Model construction of individual level models*

We used logistic regression models to identify factors associated with multidrug-resistant tuberculosis (MDR-TB) at initial diagnosis. Several potentially explanatory variables were included in the full model and then removed using a backwards elimination method as follows. Variables were removed from the multivariable model sequentially by size of p-value for association with MDR-TB (beginning with the largest). As each variable was removed, the estimated parameters in the new model were compared with those in the model before removal. If removal of the variable altered any of the estimated parameters by at least 10%, then we retained that variable in the model to ensure appropriate adjustment. If the removed variable contained missing data, when comparing the parameter estimates for confounding, we ran the two models based on identical datasets (i.e. both excluding the missing data). The final models included all variables that were statistically significantly associated with odds of MDR-TB ( $p < 0.05$  by likelihood ratio test) and other variables that helped to adjust for probable confounding.

### *Construction of maps of spatially smoothed MDR-TB burden*

We used inverse distance weighting (IDW) to smooth the risk and incidence of MDR-TB spatially. This method divides the country into cells of a pre-specified area and interpolates the value of interest,  $u$  (for example MDR-TB notified incidence) in each cell,  $x$ , based on samples  $u_i = u_i(x)$  for  $i=0, 1, \dots, N$  as follows:

$$u(x) = \sum_{i=0}^N \left( \frac{w_i(x) u_i}{\sum_{j=0}^N w_j(x)} \right) \quad \text{where} \quad w_i(x) = \frac{1}{d(x, x_i)^p} \quad \text{with } x \text{ denoting the interpolated}$$

point,  $x_i$  denoting an interpolating point,  $d$  being the distance between  $x$  and  $x_i$ ,  $N$  being the

number of points used in each interpolation and  $p$  being a positive real number (the power parameter).

As described in the main text, our data cover all notified TB cases in Moldova and drug susceptibility testing is carried out for more than 95% of all culture positive cases. Therefore, it was not necessary to interpolate any “missing” values in any localities since data were considered to be virtually complete. As such, our aim here was to create a visualization of the MDR-TB burden and so to keep our estimates in each locality as close to that observed as possible, we set  $N=4$  (i.e. a small value) and  $p=2$  (to minimize the impact of more distant points).

#### *Identifying statistically significant spatial clusters of disease*

We used Anselin’s Local Moran’s  $I$  statistic<sup>1</sup> to identify areas of statistically clustering of MDR-TB and localities which were outliers, i.e. with high proportions of TB case with MDR-TB compared to localities around them. The statistic  $I_i$  is calculated for each locality,  $i$  as follows:

$$I_i = \frac{Z_i}{m_2} \sum_j W_{ij} Z_j \quad \text{where } m_2 = \frac{\sum_i Z_i^2}{N},$$

$Z_i$  is the deviation of the variable of interest from the

mean,  $N$  is the number of localities and  $W_{ij}$  is a matrix of weights with ones in the positions  $i,j$  if locality  $i$  is a neighbour of locality  $j$  and 0 otherwise.

#### *Locality-level regression analysis*

We used logistic regression to model the number of notified MDR-TB as a proportion of the total number of TB cases with sufficient DST to diagnose MDR-TB by locality for new and previously treated cases separately. The unit of observation here was a locality. Our aim was to examine if a local concentration of TB cases with characteristics identified as individual-level risk factors in the individual-level regression analyses above (Table 2, main text) was sufficient to explain the

marked spatial heterogeneity observed in the proportion of TB cases with MDR-TB. For each individual risk factor identified above, we created an explanatory variable for the proportion of all TB cases in the locality which had that risk factor. For age, we calculated the proportion of TB cases that were less than 40 years old. Before inclusion in the model, all explanatory variables were log-transformed (natural logarithm). Since the value of the explanatory variables could be zero for which a natural logarithm does not exist, we added 0.5 to each count before creating a proportion and log-transforming to minimize bias in the resulting covariates<sup>2</sup> (i.e. for the proportion with characteristic  $x$  of  $N$  TB cases we entered the value  $\ln[(x+0.5)/N]$  into the model).

**Table 1** Potential risk factors for multidrug-resistant tuberculosis (MDR-TB) at the individual level and percentage of cases for which data were missing. Variables were only considered if less than 10% of data were missing

| Variable                                            | Possible forms <sup>c</sup>                                                                                             | Percentage of new cases for which data were missing | Percentage of previously treated cases for which data were missing |
|-----------------------------------------------------|-------------------------------------------------------------------------------------------------------------------------|-----------------------------------------------------|--------------------------------------------------------------------|
| Age                                                 | a) linear, b) categorical (10 year groups)                                                                              | 0.0                                                 | 0.0                                                                |
| Living in urban/rural area                          | Binary (urban or rural)                                                                                                 | 0.0                                                 | 0.0                                                                |
| Homeless                                            | Binary (yes or no)                                                                                                      | 3.2                                                 | 3.5                                                                |
| Gender                                              | Binary (male or female)                                                                                                 | 0.0                                                 | 0.0                                                                |
| Citizenship                                         | Binary (Moldovan or other)                                                                                              | 0.0                                                 | 0.0                                                                |
| Occupation <sup>a</sup>                             | a) categorical (employed, disabled, retired, student, unemployed), b) disabled or other, c) unemployed or other         | 0.3                                                 | 1.3                                                                |
| Salaried <sup>a</sup>                               | Binary (yes or no)                                                                                                      | 0.9                                                 | 1.8                                                                |
| Education <sup>a</sup>                              | a) categorical (primary, secondary, specialized secondary, higher, no education), b) binary (education or no education) | 0.6                                                 | 1.6                                                                |
| Living conditions <sup>b</sup>                      | Binary (satisfactory or unsatisfactory)                                                                                 | 11.1                                                | 9.3                                                                |
| Was outside Moldova for >3 months in last 12 months | Binary (yes or no)                                                                                                      | 1.2                                                 | 1.7                                                                |
| Previously in detention                             | Binary (yes or no)                                                                                                      | 1.9                                                 | 2.6                                                                |
| In detention at time of diagnosis                   | Binary (yes or no)                                                                                                      | 0.0                                                 | 0.0                                                                |
| Household size                                      | a) linear, b) categorical, c) binary (lives alone or not alone)                                                         | 0.0                                                 | 0.0                                                                |
| Number of children in the household                 | a) linear, b) categorical, c) binary (some or none)                                                                     | 0.0                                                 | 0.0                                                                |
| Known TB contact in the household                   | Binary (yes or no)                                                                                                      | 0.0                                                 | 0.0                                                                |
| Smear status                                        | Categorical (positive, negative,                                                                                        | 0.0                                                 | 0.0                                                                |

---

|                            |                                                                                                           |      |      |
|----------------------------|-----------------------------------------------------------------------------------------------------------|------|------|
|                            | tested but no result, not tested)                                                                         |      |      |
| HIV status                 | a) categorical (positive, negative, tested but unknown result, not tested), b) binary (positive or other) | 1.7  | 3.0  |
| Presence of alcoholism     | Binary (yes or no)                                                                                        | 36.8 | 43.1 |
| Presence of drug abuse     | Binary (yes or no)                                                                                        | 40.7 | 50.7 |
| Presence of mental illness | Binary (yes or no)                                                                                        | 40.5 | 50.7 |
| Presence of neoplasia      | Binary (yes or no)                                                                                        | 37.2 | 46.8 |
| Taking steroids            | Binary (yes or no)                                                                                        | 46.4 | 55.6 |
| Any other comorbidity      | Binary (yes or no)                                                                                        | 46.6 | 55.6 |
| Has diabetes               | Binary (yes or no)                                                                                        | 28.3 | 27.7 |

---

<sup>a</sup>The majority of “missing” are not applicable (e.g. children); <sup>b</sup>Missing includes both those in the category “unknown living conditions” and those with no result in this field; <sup>c</sup>Where variables could be entered into the model in more than one way, univariable models of each form were compared using maximum likelihood to choose the most appropriate form.

**Table 2** Number of tuberculosis (TB) cases and usage of diagnostic tools by case type, 2007-2010. DST=drug susceptibility testing sufficient to diagnose multidrug-resistant TB. Any notable annual trends from the entire dataset are indicated in the footnotes and shown in full in Appendix Tables 3-9. Results for the entire country and the subset of those diagnosed within the penitentiary system (sub-divided into Transnistria and the rest of Moldova) are shown. Ten cases which initiated treatment abroad and were diagnosed in the penitentiary system are included in the total but not shown separately.

| Indicator                                                                                                  | Entire dataset  |                    |                            |                 | Penitentiary system |                    |                 |                |                    |                |
|------------------------------------------------------------------------------------------------------------|-----------------|--------------------|----------------------------|-----------------|---------------------|--------------------|-----------------|----------------|--------------------|----------------|
|                                                                                                            | New             | Previously treated | Initiated treatment abroad | Total           | Rest of Moldova     |                    |                 | Transnistria   |                    |                |
|                                                                                                            |                 |                    |                            |                 | New                 | Previously treated | Total*          | New            | Previously treated | Total          |
| <b>Number of TB cases</b>                                                                                  |                 |                    |                            |                 |                     |                    |                 |                |                    |                |
| Notified TB cases <sup>a</sup>                                                                             | 15574           | 7469               | 109                        | 23152           | 619                 | 747                | 1376            | 164            | 149                | 313            |
| Pulmonary TB cases                                                                                         | 13697           | 7241               | 102                        | 21040           | 587                 | 739                | 1336            | 146            | 147                | 293            |
| <b>Diagnostics</b>                                                                                         |                 |                    |                            |                 |                     |                    |                 |                |                    |                |
| Number of pulmonary TB cases that received microscopy (% of all pulmonary TB cases)                        | 13307<br>(97.2) | 7122<br>(98.4)     | 101<br>(99.0)              | 20530<br>(97.6) | 587<br>(100.0)      | 739<br>(100.0)     | 1336<br>(100.0) | 146<br>(100.0) | 147<br>(100.0)     | 293<br>(100.0) |
| Number of pulmonary TB cases with positive smear (% of those receiving microscopy) <sup>b</sup>            | 5713<br>(42.9)  | 4445<br>(62.4)     | 43<br>(42.6)               | 10201<br>(49.7) | 176<br>(30.0)       | 481<br>(65.1)      | 660<br>(49.4)   | 88<br>(60.3)   | 126<br>(85.7)      | 214<br>(73.0)  |
| Number of pulmonary TB cases that received culture (% of all pulmonary TB cases) <sup>c</sup>              | 12523<br>(91.4) | 6728<br>(92.9)     | 95<br>(93.1)               | 19346<br>(91.9) | 566<br>(96.4)       | 714<br>(96.6)      | 1288<br>(96.4)  | 80<br>(54.8)   | 92<br>(62.6)       | 172<br>(58.7)  |
| Number of pulmonary TB cases with positive culture (% of those cultured)                                   | 5741<br>(45.8)  | 3734<br>(55.5)     | 36<br>(37.9)               | 9511<br>(49.2)  | 220<br>(38.9)       | 397<br>(55.6)      | 619<br>(48.1)   | 13<br>(16.3)   | 26<br>(28.3)       | 39<br>(22.7)   |
| Number of cases receiving DST, including non-pulmonary (% of all cases with positive culture) <sup>d</sup> | 5442<br>(94.8)  | 3488<br>(93.4)     | 36<br>(100.0)              | 8966<br>(94.3)  | 225<br>(99.1)       | 379<br>(95.2)      | 606<br>(96.7)   | 9<br>(69.2)    | 22<br>(84.6)       | 31<br>(79.5)   |
| Number of pulmonary TB cases with both negative smear and culture (of all pulmonary TB cases)              | 2957<br>(21.6)  | 1007<br>(13.9)     | 19<br>(18.6)               | 3983<br>(18.9)  | 210<br>(35.8)       | 110<br>(14.9)      | 322<br>(24.1)   | 6<br>(4.1)     | 4<br>(2.7)         | 10<br>(3.4)    |

<sup>a</sup>The number of notified TB cases fell year-on-year as did TB incidence per capita; <sup>b</sup> The percentage of cases with positive smear decreased over the study period and was 44.5% in 2010; <sup>c</sup>The percentage of pulmonary TB cases that received culture rose each year; the overall figure for 2010 was 97.7%; <sup>d</sup> The percentage of culture positive TB cases receiving DST increased 2007-9 and remained constant between 2009 and 2010; the overall figure for 2010 was 95.6%; \*Includes 10 cases that initiated treatment abroad

**Table 3** Number of tuberculosis (TB) cases by case type (new/previously treated and previously treated type) diagnosed between January 2007 and December 2010.

| Case type                  | Previously treated type           | Number of TB cases |      |      |      | Number of pulmonary TB cases |      |      |      |
|----------------------------|-----------------------------------|--------------------|------|------|------|------------------------------|------|------|------|
|                            |                                   | 2007               | 2008 | 2009 | 2010 | 2007                         | 2008 | 2009 | 2010 |
| New                        |                                   | 4135               | 3926 | 3782 | 3731 | 3627                         | 3444 | 3311 | 3315 |
| Previously treated         | Smear microscopy negative relapse | 524                | 462  | 474  | 467  | 521                          | 462  | 473  | 467  |
|                            | Smear microscopy positive relapse | 590                | 482  | 420  | 382  | 586                          | 481  | 418  | 381  |
|                            | Chronic                           | 152                | 93   | 82   | 64   | 151                          | 91   | 74   | 57   |
|                            | Default                           | 457                | 451  | 407  | 467  | 450                          | 444  | 401  | 465  |
|                            | Extrapulmonary relapse            | 38                 | 41   | 42   | 30   | 2                            | 1    | 0    | 1    |
|                            | Failure                           | 416                | 342  | 320  | 266  | 411                          | 337  | 311  | 256  |
| Total previously treated   |                                   | 2177               | 1871 | 1745 | 1676 | 2121                         | 1816 | 1677 | 1627 |
| Initiated treatment abroad |                                   | 21                 | 22   | 42   | 24   | 17                           | 21   | 40   | 24   |
| Total                      |                                   | 6333               | 5819 | 5569 | 5431 | 5765                         | 5281 | 5028 | 4966 |



**Table 4** Number of pulmonary tuberculosis (TB) cases sent for microscopy and with positive smear by case type (new/previously treated and previously treated type) diagnosed between January 2007 and December 2010.

| Case type                  | Previously treated type           | Number of pulmonary TB cases sent for microscopy (% of all pulmonary TB cases) |                |                |                | Number of pulmonary TB cases with positive smear (% of cases sent for microscopy) |                |                |                |
|----------------------------|-----------------------------------|--------------------------------------------------------------------------------|----------------|----------------|----------------|-----------------------------------------------------------------------------------|----------------|----------------|----------------|
|                            |                                   | 2007                                                                           | 2008           | 2009           | 2010           | 2007                                                                              | 2008           | 2009           | 2010           |
| New                        |                                   | 3506<br>(96.7)                                                                 | 3344<br>(97.1) | 3223<br>(97.3) | 3234<br>(97.6) | 1607<br>(45.8)                                                                    | 1527<br>(45.7) | 1314<br>(40.8) | 1265<br>(39.1) |
| Previously treated         | Smear microscopy negative relapse | 498<br>(95.6)                                                                  | 431<br>(93.3)  | 451<br>(95.3)  | 443<br>(94.9)  | 5 (1.0)                                                                           | 14<br>(3.2)    | 10<br>(2.2)    | 7 (1.6)        |
|                            | Smear microscopy positive relapse | 586<br>(100.0)                                                                 | 480<br>(99.8)  | 417<br>(99.8)  | 379<br>(99.5)  | 586<br>(100.0)                                                                    | 476<br>(99.2)  | 402<br>(96.4)  | 371<br>(97.9)  |
|                            | Chronic                           | 150<br>(99.3)                                                                  | 91<br>(100.0)  | 74<br>(100.0)  | 57<br>(100.0)  | 139<br>(92.7)                                                                     | 83<br>(91.2)   | 70<br>(94.6)   | 44<br>(77.2)   |
|                            | Default                           | 446<br>(99.1)                                                                  | 441<br>(99.3)  | 397<br>(99.0)  | 464<br>(99.8)  | 313<br>(70.2)                                                                     | 307<br>(69.6)  | 270<br>(68.0)  | 300<br>(64.7)  |
|                            | Extrapulmonary relapse            | 2 (100.0)                                                                      | 1 (100.0)      | 0 (NA)         | 1 (100.0)      | 0 (0.0)                                                                           | 0 (0.0)        | 0 (NA)         | 0 (0.0)        |
|                            | Failure                           | 410<br>(99.8)                                                                  | 337<br>(100.0) | 311<br>(100.0) | 255<br>(99.6)  | 365<br>(89.0)                                                                     | 279<br>(82.8)  | 239<br>(76.8)  | 165<br>(64.7)  |
| Total previously treated   |                                   | 2092<br>(98.6)                                                                 | 1781<br>(98.1) | 1650<br>(98.4) | 1599<br>(98.3) | 1408<br>(67.3)                                                                    | 1159<br>(65.1) | 991<br>(60.1)  | 887<br>(55.5)  |
| Initiated treatment abroad |                                   | 17<br>(100.0)                                                                  | 20 (95.2)      | 40<br>(100.0)  | 24<br>(100.0)  | 8 (47.1)                                                                          | 6<br>(30.0)    | 18<br>(45.0)   | 11<br>(45.8)   |
| Total                      |                                   | 5615<br>(97.4)                                                                 | 5145<br>(97.4) | 4913<br>(97.7) | 4857<br>(97.8) | 3023<br>(53.8)                                                                    | 2692<br>(52.3) | 2323<br>(47.3) | 2163<br>(44.5) |

**Table 5** Number of pulmonary tuberculosis (TB) cases sent for culture and with positive culture by case type (new/previously treated and previously treated type) diagnosed between January 2007 and December 2010.

| Case type                  | Previously treated type           | Number of pulmonary TB cases sent for culture (% of all pulmonary TB cases) |                |                |                | Number of pulmonary TB cases with positive culture (% of cases sent for culture) |                |                |                |
|----------------------------|-----------------------------------|-----------------------------------------------------------------------------|----------------|----------------|----------------|----------------------------------------------------------------------------------|----------------|----------------|----------------|
|                            |                                   | 2007                                                                        | 2008           | 2009           | 2010           | 2007                                                                             | 2008           | 2009           | 2010           |
| New                        |                                   | 3019<br>(83.2)                                                              | 3064<br>(89.0) | 3200<br>(96.6) | 3240<br>(97.7) | 1428<br>(47.3)                                                                   | 1410<br>(46.0) | 1360<br>(42.5) | 1543<br>(47.6) |
| Previously treated         | Smear microscopy negative relapse | 413<br>(79.3)                                                               | 394<br>(85.3)  | 451<br>(95.3)  | 438<br>(93.8)  | 110<br>(26.6)                                                                    | 118<br>(29.9)  | 125<br>(27.7)  | 140<br>(32.0)  |
|                            | Smear microscopy positive relapse | 525<br>(89.6)                                                               | 443<br>(92.1)  | 413<br>(98.8)  | 377<br>(99.0)  | 344<br>(65.5)                                                                    | 309<br>(69.8)  | 284<br>(68.8)  | 296<br>(78.5)  |
|                            | Chronic                           | 146<br>(96.7)                                                               | 87 (95.6)      | 74<br>(100.0)  | 57<br>(100.0)  | 98<br>(67.1)                                                                     | 68<br>(78.2)   | 55<br>(74.3)   | 37<br>(64.9)   |
|                            | Default                           | 388<br>(86.2)                                                               | 413<br>(93.0)  | 391<br>(97.5)  | 460<br>(98.9)  | 225<br>(58.0)                                                                    | 241<br>(58.4)  | 227<br>(58.1)  | 282<br>(61.3)  |
|                            | Extrapulmonary relapse            | 1 (50.0)                                                                    | 1 (100.0)      | 0 (NA)         | 0 (0.0%)       | 0 (0.0)                                                                          | 0 (0.0)        | 0 (NA)         | 0 (NA)         |
|                            | Failure                           | 383<br>(93.2)                                                               | 319<br>(94.7)  | 300<br>(96.5)  | 254<br>(99.2)  | 255<br>(66.6)                                                                    | 204<br>(63.9)  | 161<br>(53.7)  | 155<br>(61.0)  |
| Total previously treated   |                                   | 1856<br>(87.5)                                                              | 1657<br>(91.2) | 1629<br>(97.1) | 1586<br>(97.5) | 1032<br>(55.6)                                                                   | 940<br>(56.7)  | 852<br>(52.3)  | 910<br>(57.4)  |
| Initiated treatment abroad |                                   | 16 (94.1)                                                                   | 17 (81.0)      | 38 (95.0)      | 24<br>(100.0)  | 4<br>(25.0)                                                                      | 7<br>(41.2)    | 14<br>(36.8)   | 11<br>(45.8)   |
| Total                      |                                   | 4891<br>(84.8)                                                              | 4738<br>(89.7) | 4867<br>(96.8) | 4850<br>(97.7) | 2464<br>(50.4)                                                                   | 2357<br>(49.7) | 2226<br>(45.7) | 2464<br>(50.8) |

**Table 6** Number of tuberculosis (TB) cases with drug susceptibility testing (DST) for multidrug-resistant tuberculosis (MDR-TB) by case type (new/previously treated and previously treated type) diagnosed between January 2007 and December 2010.

| Case type                  | Previously treated type           | Number of cases with DST for MDR-TB, including non-pulmonary (% of all cases with positive culture) |             |             |             |
|----------------------------|-----------------------------------|-----------------------------------------------------------------------------------------------------|-------------|-------------|-------------|
|                            |                                   | 2007                                                                                                | 2008        | 2009        | 2010        |
| New                        |                                   | 1246 (85.3)                                                                                         | 1335 (93.3) | 1340 (96.8) | 1521 (96.6) |
| Previously treated         | Smear microscopy negative relapse | 101 (91.0)                                                                                          | 110 (93.2)  | 123 (98.4)  | 136 (97.1)  |
|                            | Smear microscopy positive relapse | 309 (89.3)                                                                                          | 300 (96.8)  | 280 (98.6)  | 281 (94.9)  |
|                            | Chronic                           | 89 (90.8)                                                                                           | 59 (86.8)   | 54 (98.2)   | 33 (86.8)   |
|                            | Default                           | 207 (91.6)                                                                                          | 230 (95.0)  | 216 (95.2)  | 262 (92.9)  |
|                            | Extrapulmonary relapse            | 2 (33.3)                                                                                            | 1 (50.0)    | 1 (100.0)   | 3 (100.0)   |
|                            | Failure                           | 221 (86.3)                                                                                          | 182 (89.2)  | 143 (88.8)  | 145 (91.8)  |
| Total previously treated   |                                   | 929 (89.1)                                                                                          | 882 (93.4)  | 817 (95.8)  | 860 (93.8)  |
| Initiated treatment abroad |                                   | 5 (100.0)                                                                                           | 7 (100.0)   | 14 (100.0)  | 10 (90.9)   |
| Total                      |                                   | 2180 (86.9)                                                                                         | 2224 (93.4) | 2171 (96.4) | 2391 (95.6) |

|

**Table 7** Number of pulmonary tuberculosis (TB) cases with both negative smear and culture results by case type (new/previously treated and previously treated type) diagnosed between January 2007 and December 2010.

| Case type                  | Previously treated type           | Number of cases with both negative smear and culture results<br>(% of all pulmonary TB cases) |                   |                    |                    |
|----------------------------|-----------------------------------|-----------------------------------------------------------------------------------------------|-------------------|--------------------|--------------------|
|                            |                                   | 2007                                                                                          | 2008              | 2009               | 2010               |
| New                        |                                   | 685 (18.9)                                                                                    | 544 (15.8)        | 791 (23.9)         | 937 (28.3)         |
| Previously treated         | Smear microscopy negative relapse | 186 (35.7)                                                                                    | 145 (31.4)        | 180 (38.1)         | 185 (39.6)         |
|                            | Smear microscopy positive relapse | 0 (0.0)                                                                                       | 0 (0.0)           | 1 (<0.1)           | 0 (0.0)            |
|                            | Chronic                           | 4 (2.6)                                                                                       | 1 (1.0)           | 0 (0.0)            | 7 (12.3)           |
|                            | Default                           | 45 (10.0)                                                                                     | 45 (10.1)         | 31 (7.7)           | 74 (15.9)          |
|                            | Extrapulmonary relapse            | 0 (0.0)                                                                                       | 1 (100.0)         | 0 (0.0)            | 0 (0.0)            |
|                            | Failure                           | 17 (4.1)                                                                                      | 17 (5.0)          | 33 (10.6)          | 35 (13.7)          |
|                            | Total previously treated          |                                                                                               | 252 (11.9)        | 209 (11.5)         | 245 (14.6)         |
| Initiated treatment abroad |                                   | 2 (11.8)                                                                                      | 3 (14.3)          | 7 (17.5)           | 7 (29.2)           |
| <b>Total</b>               |                                   | <b>939 (16.3)</b>                                                                             | <b>756 (14.3)</b> | <b>1043 (20.7)</b> | <b>1245 (25.1)</b> |

**Table 8** Number and percentage of tuberculosis (TB) cases with multidrug-resistant tuberculosis (MDR-TB) by case type (new/previously treated and previously treated type) diagnosed between January 2007 and December 2010.

| Case type                  | Previously treated type           | Number of MDR-TB cases, including non-pulmonary |      |      |      | % MDR-TB of all with DST for MDR-TB including non-pulmonary |      |      |      |
|----------------------------|-----------------------------------|-------------------------------------------------|------|------|------|-------------------------------------------------------------|------|------|------|
|                            |                                   | 2007                                            | 2008 | 2009 | 2010 | 2007                                                        | 2008 | 2009 | 2010 |
| New                        |                                   | 251                                             | 341  | 315  | 372  | 20.1                                                        | 25.5 | 23.5 | 24.5 |
| Previously treated         | Smear microscopy negative relapse | 56                                              | 59   | 77   | 80   | 55.4                                                        | 53.6 | 62.6 | 58.8 |
|                            | Smear microscopy positive relapse | 139                                             | 155  | 152  | 139  | 45.0                                                        | 51.7 | 54.3 | 49.5 |
|                            | Chronic                           | 74                                              | 55   | 46   | 27   | 83.1                                                        | 93.2 | 85.2 | 81.8 |
|                            | Default                           | 123                                             | 135  | 147  | 168  | 59.4                                                        | 58.7 | 68.1 | 64.1 |
|                            | Extrapulmonary relapse            | 2                                               | 0    | 0    | 1    | 100.0                                                       | 0.0  | 0.0  | 33.3 |
|                            | Failure                           | 172                                             | 128  | 106  | 105  | 77.8                                                        | 70.3 | 74.1 | 72.4 |
| Total previously treated   |                                   | 566                                             | 532  | 528  | 520  | 60.9                                                        | 60.3 | 64.6 | 60.5 |
| Initiated treatment abroad |                                   | 3                                               | 5    | 10   | 4    | 60.0                                                        | 71.4 | 71.4 | 40.0 |
| Total                      |                                   | 820                                             | 878  | 853  | 896  | 37.6                                                        | 39.5 | 39.3 | 37.5 |

**Table 9** Notified and estimated multidrug-resistant tuberculosis (MDR-TB) incidence by case type (new/previously treated and previously treated type) diagnosed between January 2007 and December 2010.

| Case type                  | Previously treated type           | Notified MDR-TB incidence per 100,000 population |       |       |       | Estimated MDR-TB incidence per 100,000 (based on smear and/or culture +) |       |       |       | Estimated MDR-TB incidence per 100,000 population (based on all TB cases) |       |       |       |
|----------------------------|-----------------------------------|--------------------------------------------------|-------|-------|-------|--------------------------------------------------------------------------|-------|-------|-------|---------------------------------------------------------------------------|-------|-------|-------|
|                            |                                   | 2007                                             | 2008  | 2009  | 2010  | 2007                                                                     | 2008  | 2009  | 2010  | 2007                                                                      | 2008  | 2009  | 2010  |
| New                        |                                   | 6.07                                             | 8.27  | 7.66  | 9.06  | 9.80                                                                     | 12.18 | 10.25 | 11.08 | 20.10                                                                     | 24.28 | 21.61 | 22.27 |
| Previously treated         | Smear microscopy negative relapse | 1.35                                             | 1.43  | 1.87  | 1.95  | 1.50                                                                     | 1.59  | 1.92  | 2.02  | 7.02                                                                      | 6.01  | 7.21  | 6.69  |
|                            | Smear microscopy positive relapse | 3.36                                             | 3.76  | 3.70  | 3.39  | 6.42                                                                     | 6.04  | 5.51  | 4.58  | 6.42                                                                      | 6.04  | 5.55  | 4.61  |
|                            | Chronic                           | 1.79                                             | 1.33  | 1.12  | 0.66  | 2.91                                                                     | 1.99  | 1.49  | 1.00  | 3.05                                                                      | 2.10  | 1.70  | 1.28  |
|                            | Default                           | 2.97                                             | 3.27  | 3.57  | 4.09  | 4.88                                                                     | 4.86  | 5.17  | 5.56  | 6.56                                                                      | 6.42  | 6.74  | 7.29  |
|                            | Extrapulmonary relapse            | 0.05                                             | 0.00  | 0.00  | 0.02  | 0.22                                                                     | 0.00  | 0.00  | 0.02  | 0.92                                                                      | 0.00  | 0.00  | 0.24  |
|                            | Failure                           | 4.16                                             | 3.10  | 2.58  | 2.56  | 7.22                                                                     | 5.20  | 4.72  | 3.74  | 7.83                                                                      | 5.83  | 5.77  | 4.69  |
| Total previously treated   |                                   | 13.68                                            | 12.90 | 12.84 | 12.67 | 23.26                                                                    | 19.60 | 18.68 | 16.83 | 32.06                                                                     | 27.37 | 27.41 | 24.71 |
| Initiated treatment abroad |                                   | 0.07                                             | 0.12  | 0.24  | 0.10  | 0.13                                                                     | 0.17  | 0.38  | 0.14  | 0.30                                                                      | 0.38  | 0.73  | 0.23  |
| Total                      |                                   | 19.83                                            | 21.30 | 20.74 | 21.83 | 32.77                                                                    | 31.80 | 28.73 | 27.52 | 57.57                                                                     | 55.75 | 53.22 | 49.62 |

**Table 10** Potential risk factors for multidrug-resistant tuberculosis (MDR-TB) at the individual level

which were not significantly associated with odds of having MDR-TB. Variables were only considered if more less than 10% of data were missing (Appendix Table 1). Odd ratios, 95% confidence intervals (CI) and p-values are shown adjusting for all other variables included in the final models as presented in Table 2 (see Main Text)

| Variable                                            | Final form used*                        | Odds ratio (95% CI) and, p-value in model for MDR-TB risk among new TB cases. | Odds ratio (95% CI) and, p-value model for MDR-TB risk among previously treated TB cases. |
|-----------------------------------------------------|-----------------------------------------|-------------------------------------------------------------------------------|-------------------------------------------------------------------------------------------|
| Age                                                 | Linear                                  | Significantly associated, included in final model (see Table 3)               | Significantly associated, included in final model (see Table 3)                           |
| Urban/rural location                                | Binary (urban vs rural)                 | Significantly associated, included in final model (see Table 3)               | Significantly associated, included in final model (see Table 3)                           |
| Homeless                                            | Binary (yes vs no)                      | 1.15 (0.94, 1.41), p=0.18                                                     | Borderline significantly associated, included in final model (see Table 3)                |
| Gender                                              | Binary (male vs female)                 | 0.94 (0.83, 1.05), p=0.28                                                     | 0.94 (0.87, 1.01), p=0.074                                                                |
| Citizenship                                         | Binary (Moldovan vs other)              | 1.07 (0.62, 1.85), p=0.79                                                     | 0.92 (0.58, 1.48), p=0.74                                                                 |
| Occupation                                          | Binary (disabled vs other)              | 0.81 (0.62, 1.05), p=0.096                                                    | Significantly associated, included in final model (see Table 3)                           |
| Salaried                                            | Binary (yes vs no)                      | 1.08 (0.96, 1.22), p=0.19                                                     | 0.99 (0.41, 2.40), p=0.85                                                                 |
| Education                                           | Binary (education vs no education)      | 1.24 (0.87, 1.78), p=0.27                                                     | 0.90 (0.70, 1.17), p=0.43                                                                 |
| Living conditions                                   | Binary (satisfactory vs unsatisfactory) | Excluded, >10% missing data                                                   | 0.98 (0.93, 1.04), p=0.60                                                                 |
| Was outside Moldova for >3 months in last 12 months | Binary (yes vs no)                      | Significantly associated, included in final model (see Table 3)               | 0.97 (0.90, 1.05), p=0.49                                                                 |
| Previously in detention                             | Binary (yes vs no)                      | Significantly associated, included in final model (see Table 3)               | Significantly associated, included in final model (see Table 3)                           |
| In detention at time of diagnosis                   | Binary (yes vs no)                      | Not significantly associated, included as a confounder (see Table 3)          | Significantly associated, included in final model (see Table 3)                           |
| Household size                                      | Binary (lives alone vs not)             | 1.00 (0.87, 1.15), p=0.96                                                     | Not significantly associated, included as a                                               |

|                                     |                                                                    |                                                                 |                                                                      |
|-------------------------------------|--------------------------------------------------------------------|-----------------------------------------------------------------|----------------------------------------------------------------------|
|                                     | alone)                                                             |                                                                 | confounder (see Table 3)                                             |
| Number of children in the household | Binary (some vs none)                                              | 1.13 (0.91, 1.12), p=0.82                                       | 0.95 (0.89, 1.02), p=0.15                                            |
| Known TB contact in the household   | Binary (yes vs no)                                                 | Significantly associated, included in final model (see Table 3) | 0.99 (0.89, 1.11), p=0.92                                            |
| Smear status                        | Categorical (positive, negative, tested but no result, not tested) | P-value for variable = 0.094                                    | P-value for variable = 0.25                                          |
|                                     | Positive (reference group)                                         | 1.00                                                            | 1.00                                                                 |
|                                     | Negative                                                           | 0.91 (0.82, 1.01)                                               | 1.00 (0.94, 1.07)                                                    |
|                                     | Tested but no result                                               | 1.24 (0.64, 2.39)                                               | 1.22 (0.96, 1.54)                                                    |
|                                     | Not tested                                                         | 1.53 (0.99, 2.35)                                               | 0.59 (0.25, 1.39)                                                    |
| HIV status                          | Binary (positive vs other)                                         | Significantly associated, included in final model (see Table 3) | Not significantly associated, included as a confounder (see Table 3) |
| Presence of alcoholism              | Binary (yes or no)                                                 | Excluded, >10% missing data                                     | Excluded, >10% missing data                                          |
| Presence of drug abuse              | Binary (yes or no)                                                 | Excluded, >10% missing data                                     | Excluded, >10% missing data                                          |
| Presence of mental illness          | Binary (yes or no)                                                 | Excluded, >10% missing data                                     | Excluded, >10% missing data                                          |
| Presence of neoplasia               | Binary (yes or no)                                                 | Excluded, >10% missing data                                     | Excluded, >10% missing data                                          |
| Taking steroids                     | Binary (yes or no)                                                 | Excluded, >10% missing data                                     | Excluded, >10% missing data                                          |
| Any other comorbidity               | Binary (yes or no)                                                 | Excluded, >10% missing data                                     | Excluded, >10% missing data                                          |
| Has diabetes                        | Binary (yes or no)                                                 | Excluded, >10% missing data                                     | Excluded, >10% missing data                                          |

\*Where variables could be entered into the model in more than one way, univariable models of each form were compared using maximum likelihood to choose the most appropriate form (see Table S1).



**Figure 1** Culture use and positivity by rayon. Percentage of pulmonary TB cases that received culture (A) and percentage culture positive of those that received culture (B) by rayon, 2007-2010.

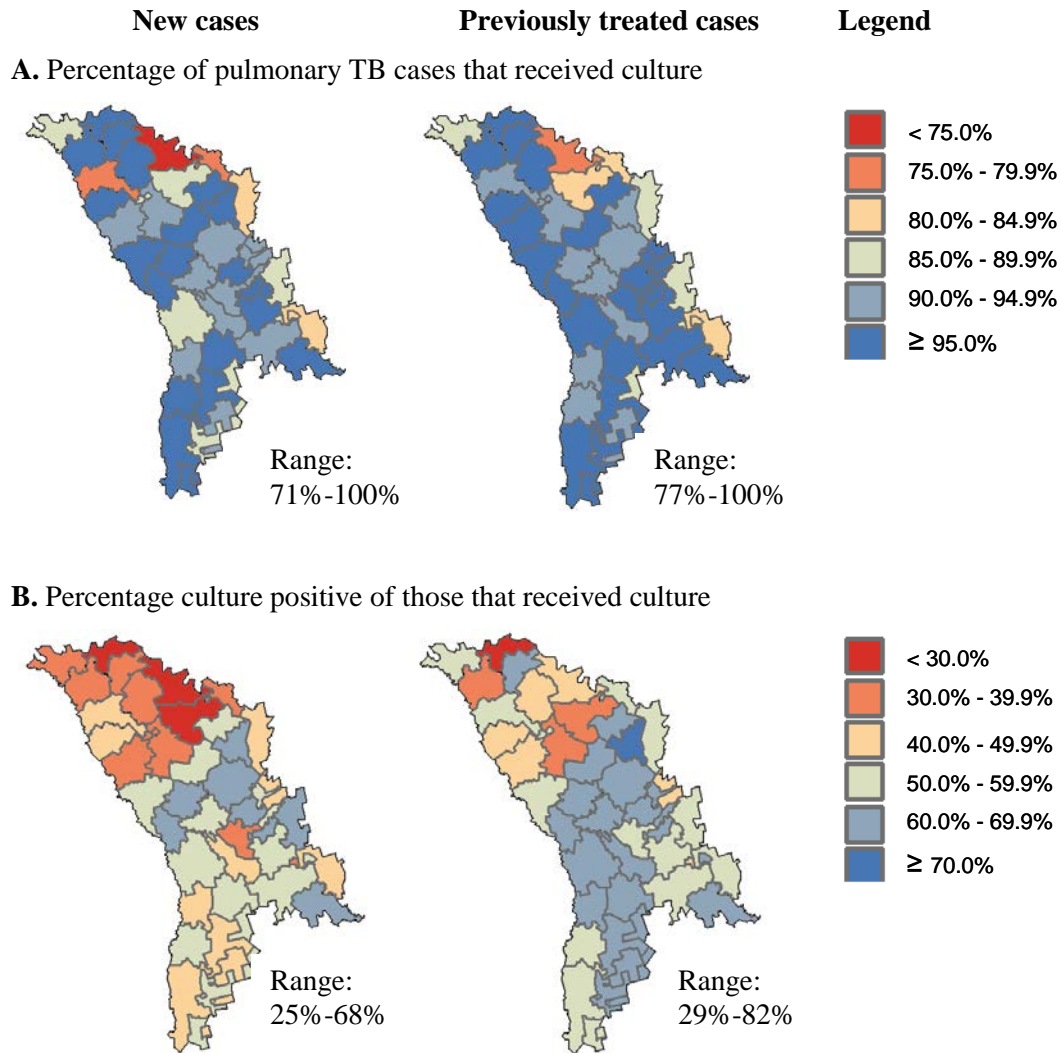

**Figure 2** Percentage with and notified and estimated incidence of MDR-TB by rayon, 2007-2010.

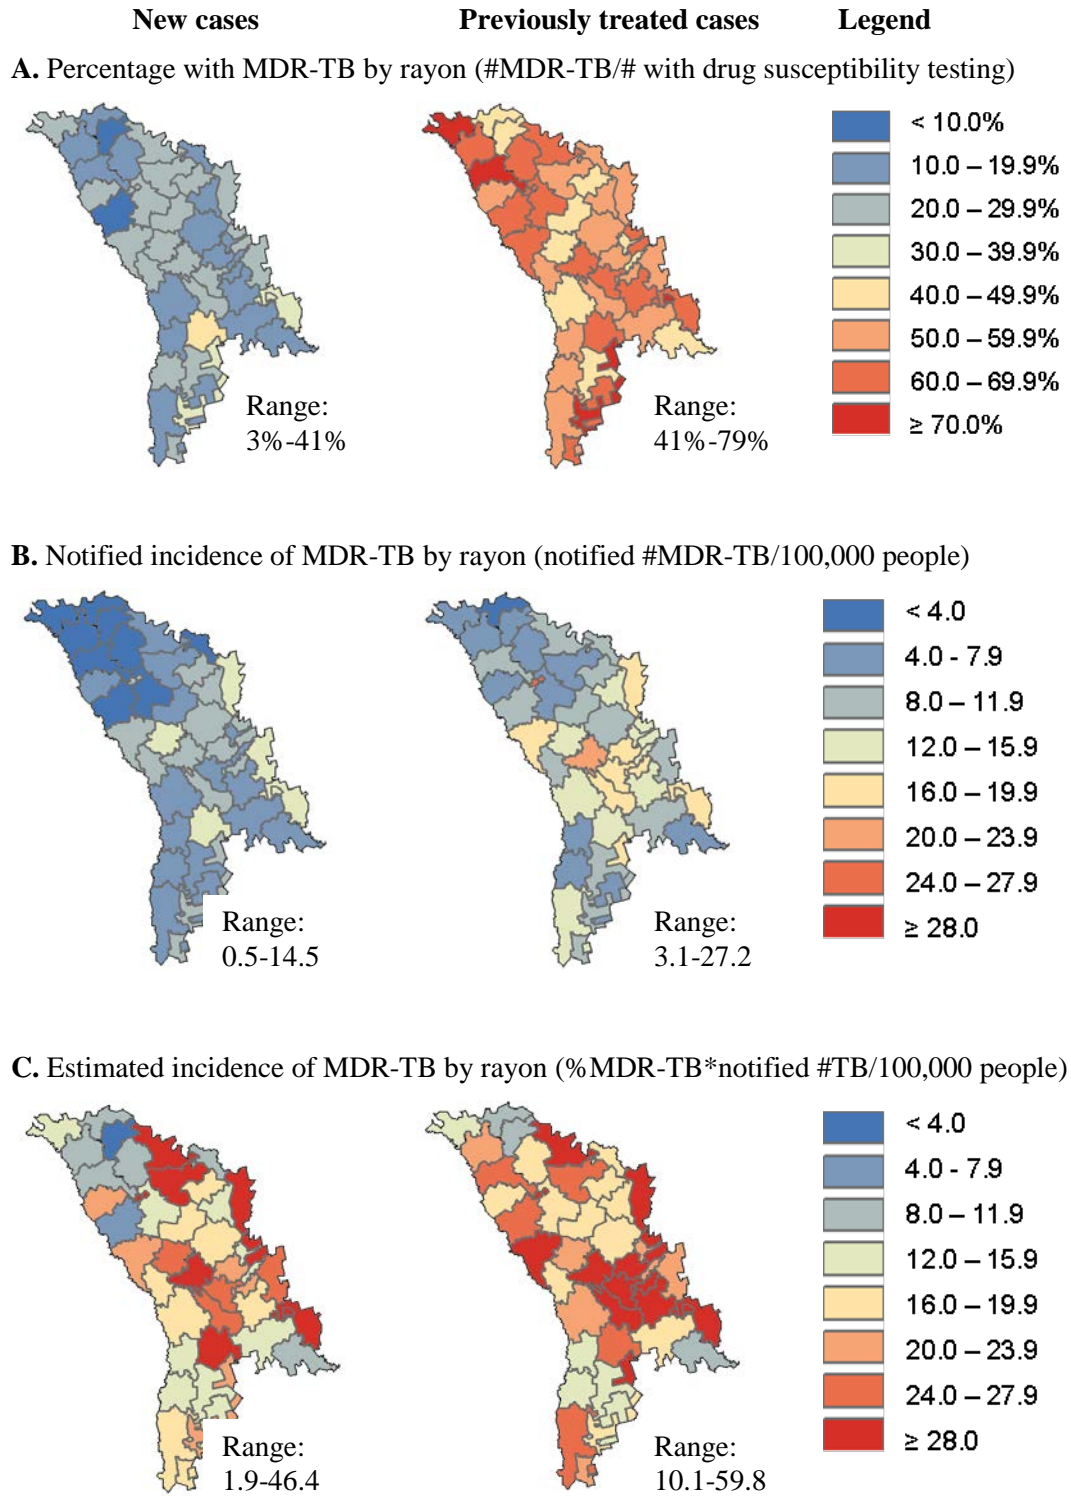

## References

1. Anselin L. Local Indicators of Spatial Association - LISA. *Geographical Analysis* 1995;27:93-115.
2. Cox D. Some statistical methods connected with series events. *Journal of the Royal Statistical Society Series B - Methodological* 1955:129-64.
